# Supplementary material for: Physiological Condition of Juvenile Wading Birds in Relation to Multiple Landscape Stressors in the Florida Everglades: Effects of Hydrology, Prey Availability, and Mercury Bioaccumulation
Source: PubMed Central journal article supplement (PMC4153589; doi:10.1371/journal.pone.0106447), 2014-09-03
Supplement: pone.0106447.s002.pdf [file pone.0106447.s002.pdf]

| Year | Species | NestID | ChickID | Hg    | Hatch order | Region | Depth 2 week | Recess 2 week | Biomass 2 week | Age | HSP60 | HSP70 | FCORT | Mass | Tarsus |
|------|---------|--------|---------|-------|-------------|--------|--------------|---------------|----------------|-----|-------|-------|-------|------|--------|
| 2007 | GREG    | gc74   | gc74-1  | 6.33  | A           | WCA1   | -46.62       | -1.42         | 4.06           | 33  | 16.49 |       | 11.02 | 625  | 111    |
| 2007 | GREG    | gc74   | gc74-2  | 7.63  | B           | WCA1   | -46.62       | -1.42         | 4.06           | 30  | 16.15 |       | 21.47 | 420  | 96     |
| 2007 | GREG    | gc76   | gc76-1  | 2.41  | A           | WCA1   | -46.62       | -1.42         | 4.06           | 30  | 19.30 | 10.62 | 9.51  | 700  | 110    |
| 2007 | GREG    | gc76   | gc76-2  | 3.01  | B           | WCA1   | -46.62       | -1.42         | 4.06           | 30  | 18.90 | 3.10  |       | 490  | 95     |
| 2007 | GREG    | gc78   | gc78-1  | 4.52  | A           | WCA1   | -46.62       | -1.42         | 4.06           | 30  | 15.46 | 1.37  | 9.72  | 590  | 92     |
| 2007 | GREG    | gc81   | gc81-1  | 5.59  | A           | WCA1   | -46.62       | -1.42         | 4.06           | 30  | 6.52  | 1.59  | 12.16 | 530  | 87     |
| 2007 | GREG    | gc81   | gc81-2  | 6.44  | B           | WCA1   | -46.62       | -1.42         | 4.06           | 30  | 6.29  | 4.30  |       | 560  | 68     |
| 2007 | GREG    | gc82   | gc82-1  | 5.54  | A           | WCA1   | -46.62       | -1.42         | 4.06           | 30  | 12.77 | 1.91  | 5.69  | 490  | 87     |
| 2006 | GREG    | gc3    | gc3-1   | 4.91  | A           | WCA1   | -3.74        | -1.32         | 51.1           | 24  | 17.95 |       | 1.02  | 640  | 107.6  |
| 2006 | GREG    | gr216  | gr216-1 | 6.31  | A           | WCA2   | -3.74        | -1.32         | 14.61          | 18  | 15.31 |       | 0.85  | 545  | 77.1   |
| 2006 | GREG    | gr218  | gr218-1 | 6.04  | A           | WCA2   | -3.74        | -1.32         | 14.61          | 27  | 24.29 | 1.02  | 0.47  | 1090 | 123.6  |
| 2006 | GREG    | gc6    | gc6-1   | 7.48  | A           | WCA1   | -3.74        | -1.32         | 51.1           | 27  | 7.16  |       |       | 705  | 123.8  |
| 2006 | GREG    | gc4    | gc4-1   | 3.99  | A           | WCA1   | -3.74        | -1.32         | 51.1           | 30  | 5.47  |       |       | 1000 | 132.5  |
| 2006 | GREG    | gc5    | gc5-1   |       | A           | WCA1   | -3.74        | -1.32         | 51.1           | 27  | 16.42 |       | 1.90  | 1070 | 153    |
| 2007 | GREG    | gc12   | gc12-2  | 4.12  | B           | WCA1   | -17.97       | -1.21         | 12.42          | 9   | 14.64 |       | 26.72 | 150  | 36     |
| 2007 | GREG    | gc13   | gc13-1  | 6.42  | A           | WCA1   | -17.97       | -1.21         | 12.42          | 15  | 54.24 | 69.87 | 28.81 | 270  | 49     |
| 2007 | GREG    | gc13   | gc13-2  | 7.80  | B           | WCA1   | -17.97       | -1.21         | 12.42          | 15  | 12.62 | 1.03  | 0.84  | 220  | 45     |
| 2007 | GREG    | gc16   | gc16-1  | 8.34  | A           | WCA1   | -17.97       | -1.21         | 12.42          | 9   | 25.90 | 2.56  | 55.74 | 190  | 41     |
| 2007 | GREG    | gc16   | gc16-2  | 10.23 | B           | WCA1   | -17.97       | -1.21         | 12.42          | 9   | 15.38 | 5.07  | 23.49 | 205  | 42     |
| 2007 | GREG    | gc19   | gc19-1  | 3.12  | A           | WCA1   | -17.97       | -1.21         | 12.42          | 12  | 24.55 | 5.56  |       | 200  | 40     |
| 2007 | GREG    | gc20   | gc20-1  | 6.05  | A           | WCA1   | -17.97       | -1.21         | 12.42          | 9   | 62.08 | 2.49  | 12.80 | 190  | 33     |
| 2007 | GREG    | gc17   | gc17-1  | 2.21  | A           | WCA1   | -17.97       | -1.21         | 12.42          | 15  | 14.75 | 3.98  | 17.14 | 220  | 48     |
| 2007 | GREG    | gc14   | gc14-2  | 10.40 | B           | WCA1   | -17.97       | -1.21         | 12.42          | 9   | 24.74 | 2.47  | 30.78 | 205  | 38     |
| 2006 | GREG    | gc12   | gc12-1  | 7.83  | A           | WCA1   | 12.65        | -1.14         | 26.74          | 30  |       |       | 49.01 | 925  | 125.7  |
| 2007 | GREG    | gc42   | gc42-1  | 1.06  | A           | WCA1   | 8.12         | -0.90         | 0.97           | 12  |       |       |       | 240  | 40     |
| 2007 | GREG    | gc43   | gc43-1  | 1.59  | A           | WCA1   | 8.12         | -0.90         | 0.97           | 3   |       |       | 13.11 | 90   | 23     |
| 2007 | GREG    | gc44   | gc44-1  | 7.96  | A           | WCA1   | 8.12         | -0.90         | 0.97           | 9   |       |       | 9.43  | 160  | 30     |
| 2007 | GREG    | gc44   | gc44-2  | 5.06  | B           | WCA1   | 8.12         | -0.90         | 0.97           | 6   |       |       | 7.61  | 90   | 23     |
| 2007 | GREG    | gc45   | gc45-1  | 0.27  | A           | WCA1   | 8.12         | -0.90         | 0.97           | 12  | 10.18 | 4.00  | 6.95  | 135  | 33     |
| 2007 | GREG    | gc45   | gc45-2  | 2.41  | B           | WCA1   | 8.12         | -0.90         | 0.97           | 9   |       |       | 1.36  | 105  | 32     |
| 2006 | GREG    | gc19   | gc19-1  | 4.98  | A           | WCA1   | 12.37        | -0.75         | 26.74          | 30  | 11.55 |       | 0.23  | 760  | 96     |

|      |      |         |           |       |   |      |        |       |      |    |       |       |       |     |       |
|------|------|---------|-----------|-------|---|------|--------|-------|------|----|-------|-------|-------|-----|-------|
| 2007 | GREG | gc12    | gc12-1    | 5.06  | A | WCA1 | -23.18 | -0.70 | 9.68 | 33 | 7.78  |       | 11.94 | 805 | 116   |
| 2007 | GREG | gc12    | gc12-2    | 4.48  | B | WCA1 | -23.18 | -0.70 | 9.68 | 30 |       | 23.58 | 11.47 | 630 | 96    |
| 2007 | GREG | gc14    | gc14-2    | 9.30  | B | WCA1 | -23.18 | -0.70 | 9.68 | 30 | 10.81 | 2.36  | 21.58 | 580 | 102   |
| 2007 | GREG | gc18    | gc18-1    | 4.88  | A | WCA1 | -23.18 | -0.70 | 9.68 | 30 | 6.01  | 2.30  | 11.39 | 360 | 70    |
| 2007 | GREG | gc19    | gc19-2    | 3.84  | B | WCA1 | -23.18 | -0.70 | 9.68 | 30 | 22.87 | 3.16  | 11.11 | 550 | 77    |
| 2007 | GREG | gc20    | gc20-1    | 11.02 | A | WCA1 | -23.18 | -0.70 | 9.68 | 30 |       | 5.36  | 7.33  | 570 | 82    |
| 2007 | GREG | gc63    | gc63-1    | 4.74  | A | WCA3 | 13.04  | -0.69 | 5.24 | 6  | 4.74  | 1.13  | 22.79 | 160 | 35    |
| 2007 | GREG | gc67    | gc67-1    | 6.76  | A | WCA3 | 13.04  | -0.69 | 5.24 | 12 | 10.22 | 1.95  | 9.19  | 170 | 33    |
| 2007 | GREG | gc67    | gc67-2    | 5.86  | B | WCA3 | 13.04  | -0.69 | 5.24 | 12 | 32.80 | 2.67  | 8.79  | 170 | 33    |
| 2007 | GREG | gc69    | gc69-2    | 1.61  | B | WCA3 | 13.04  | -0.69 | 5.24 | 12 | 7.99  | 2.20  | 6.91  | 170 | 40    |
| 2006 | GREG | gr4     | gr4-1     | 6.09  | A | WCA3 | 1.74   | -0.65 | 8.81 | 30 | 17.13 | 3.59  | 1.99  | 715 | 117.1 |
| 2006 | GREG | gr3     | gr3-1     | 6.47  | A | WCA3 | 1.74   | -0.65 | 8.81 | 36 | 0.45  | 0.22  | 0.22  | 890 | 134.7 |
| 2006 | GREG | gr1     | gr1-1     | 7.35  | A | WCA3 | 1.74   | -0.65 | 8.81 | 30 | 3.81  | 1.83  | 2.57  | 790 | 117.1 |
| 2006 | GREG | gr2     | gr2-1     | 5.73  | A | WCA3 | 1.74   | -0.65 | 8.81 | 36 | 7.98  | 2.66  | 35.19 | 760 | 122.9 |
| 2007 | GREG | gc5     | gc5-1     | 5.17  | A | WCA1 | -24.06 | -0.47 | 8.06 | 30 | 2.64  | 3.60  |       | 655 | 100   |
| 2007 | GREG | gc5     | gc5-2     | 4.95  | B | WCA1 | -24.06 | -0.47 | 8.06 | 27 | 14.56 | 2.92  |       | 390 | 64    |
| 2007 | GREG | gc6     | gc6-1     | 4.97  | A | WCA1 | -24.06 | -0.47 | 8.06 | 27 | 7.91  | 4.10  | 5.44  | 645 | 95    |
| 2007 | GREG | gc6     | gc6-2     | 5.27  | B | WCA1 | -24.06 | -0.47 | 8.06 | 27 | 9.83  |       | 3.94  | 550 | 85    |
| 2007 | GREG | gc10new | gc10new-1 | 6.74  | A | WCA1 | -24.06 | -0.47 | 8.06 | 21 | 16.61 | 5.12  | 12.93 | 575 | 80    |
| 2007 | GREG | gc10new | gc10new-2 | 6.39  | B | WCA1 | -24.06 | -0.47 | 8.06 | 18 | 12.31 | 16.92 | 9.39  | 560 | 76    |
| 2007 | GREG | gc7     | gc7-1     | 5.26  | A | WCA1 | -24.06 | -0.47 | 8.06 | 30 |       | 37.69 |       | 480 | 80    |
| 2007 | GREG | gc7     | gc7-2     | 4.09  | B | WCA1 | -24.06 | -0.47 | 8.06 | 30 | 25.45 | 31.12 | 4.00  | 550 | 80    |
| 2007 | GREG | gc8     | gc8-1     | 5.80  | A | WCA1 | -24.06 | -0.47 | 8.06 | 27 | 32.53 | 18.31 | 9.83  | 705 | 98    |
| 2007 | GREG | gc8     | gc8-2     | 6.83  | B | WCA1 | -24.06 | -0.47 | 8.06 | 30 | 58.11 | 5.06  | 3.87  | 570 | 89    |
| 2007 | GREG | gc27    | gc27-2    | 3.08  | B | WCA1 | -0.7   | -0.43 | 4.99 | 3  |       |       | 2.03  | 105 | 22    |
| 2007 | GREG | gc28    | gc28-1    |       | A | WCA1 | -0.7   | -0.43 | 4.99 | 6  |       |       | 3.31  | 160 | 35    |
| 2007 | GREG | gc28    | gc28-2    | 8.22  | B | WCA1 | -0.7   | -0.43 | 4.99 | 3  |       |       | 27.11 | 75  | 26    |
| 2007 | GREG | gc32    | gc32-2    | 6.32  | B | WCA1 | -0.7   | -0.43 | 4.99 | 6  |       |       | 11.51 | 149 | 32    |
| 2007 | GREG | gc91    | gc91-1    | 6.44  | A | WCA2 | -15.03 | 0.05  | 9.34 | 24 | 9.88  | 27.30 |       | 485 | 82    |
| 2007 | GREG | gc91    | gc91-2    | 9.65  | B | WCA2 | -15.03 | 0.05  | 9.34 | 21 | 14.85 | 2.77  | 17.66 | 295 | 71    |
| 2006 | GREG | gc15    | gc15-1    | 4.30  | A | WCA1 | 3.44   | 0.11  | 4.88 | 21 | 19.49 |       | 0.88  | 530 | 76.4  |
| 2007 | GREG | gc60    | gc60-1    | 6.52  | A | WCA3 | -2.1   | 0.24  | 4.34 | 36 | 5.02  | 2.49  | 4.73  | 570 | 96    |
| 2007 | GREG | gc60    | gc60-2    | 6.12  | B | WCA3 | -2.1   | 0.24  | 4.34 | 36 | 24.43 | 9.58  |       | 575 | 95    |
| 2007 | GREG | 153.527 | 153.527-B | 7.43  | B | WCA3 | 1.44   | 0.24  | 4.34 | 39 | 15.65 | 5.26  | 16.21 | 620 | 89    |

|      |      |         |           |      |   |      |        |      |       |    |       |        |       |     |       |
|------|------|---------|-----------|------|---|------|--------|------|-------|----|-------|--------|-------|-----|-------|
| 2007 | GREG | gc65    | gc65-1    | 7.06 | A | WCA3 | 1.44   | 0.27 | 4.34  | 27 | 12.31 | 1.78   | 6.75  | 565 | 93    |
| 2007 | GREG | gc65    | gc65-2    | 5.45 | B | WCA3 | 1.44   | 0.27 | 4.34  | 27 | 16.84 | 1.44   | 7.74  | 550 | 85    |
| 2007 | GREG | gc68    | gc68-1    | 8.06 | A | WCA3 | 1.44   | 0.27 | 4.34  | 30 | 18.49 | 1.34   |       | 585 | 93    |
| 2007 | GREG | gc68    | gc68-2    | 8.32 | B | WCA3 | 1.44   | 0.27 | 4.34  | 27 | 35.25 | 1.55   | 8.10  | 520 | 80    |
| 2007 | GREG | gc92    | gc92-1    | 4.71 | A | WCA2 | -5.93  | 0.30 | 15.63 | 6  |       |        | 14.67 | 120 | 22    |
| 2007 | GREG | gc92    | gc92-2    |      | B | WCA2 | -5.93  | 0.30 | 15.63 | 3  |       |        | 6.01  | 105 | 23    |
| 2007 | GREG | gc45    | gc45-1    | 3.60 | A | WCA1 | -9.15  | 0.35 | 4.06  | 42 | 1.46  | 2.09   | 16.67 | 805 | 114   |
| 2007 | GREG | gc44    | gc44-1    |      | A | WCA1 | -9.15  | 0.35 | 4.06  | 39 | 9.83  |        | 7.76  | 825 | 120   |
| 2006 | GREG | gc16    | gc16-1    | 3.17 | A | WCA3 | 2.66   | 0.48 | 15.15 | 30 | 35.50 | 0.54   | 0.50  | 755 | 104.5 |
| 2006 | GREG | gc15    | gc15-1    | 4.23 | A | WCA1 | 2.66   | 0.48 | 15.15 | 30 | 26.81 | 3.73   | 0.75  | 730 | 104   |
| 2006 | GREG | gc10    | gc10-1    | 3.53 | A | WCA1 | 2.66   | 0.48 | 15.15 | 21 | 0.51  | 2.95   | 1.03  | 485 | 70.7  |
| 2007 | GREG | 152.686 | 152.686-A | 3.97 | A | WCA1 | -14.76 | 0.54 | 4.11  | 33 | 8.76  | 2.15   | 7.78  | 815 | 122   |
| 2007 | GREG | 152.686 | 152.686-B | 3.33 | B | WCA1 | -14.76 | 0.54 | 4.11  | 30 | 5.27  | 62.77  | 8.11  | 605 | 90    |
| 2007 | GREG | gc30    | gc30-1    | 5.36 | A | WCA1 | -14.76 | 0.54 | 4.11  | 27 | 10.29 |        | 32.80 | 710 | 91    |
| 2007 | GREG | gc30    | gc30-2    | 5.44 | B | WCA1 | -14.76 | 0.54 | 4.11  | 33 | 5.53  | 1.14   | 34.24 | 445 | 74    |
| 2007 | GREG | gc27    | gc27-1    | 4.54 | A | WCA1 | -14.76 | 0.54 | 4.11  | 30 | 73.12 | 102.58 | 1.10  | 835 | 115   |
| 2007 | GREG | gc27    | gc27-2    | 5.54 | B | WCA1 | -14.76 | 0.54 | 4.11  | 27 | 19.68 |        | 1.47  | 840 | 120   |
| 2007 | GREG | gc72    | gc72-1    | 0.98 | A | WCA1 | -32.39 | 0.60 | 2.97  | 9  |       | 13.92  |       | 290 | 51    |
| 2007 | GREG | gc76    | gc76-1    | 0.39 | A | WCA1 | -32.39 | 0.60 | 2.97  | 3  |       |        | 14.20 | 70  | 21    |
| 2007 | GREG | gc72    | gc72-2    | 0.87 | B | WCA1 | -32.39 | 0.60 | 2.97  | 9  |       |        |       | 235 | 45    |
| 2006 | GREG | GC2     | GC2-1     | 5.40 | A | WCA3 | -26.15 | 0.61 | 14.38 | 24 | 29.94 | 3.39   | 4.27  | 675 | 93.5  |
| 2007 | GREG | 153.527 | 153.527-B | 3.01 | B | WCA3 | 10.16  | 0.62 | 5.24  | 18 | 29.18 | 1.42   | 15.69 | 260 | 47    |
| 2007 | GREG | 153.527 | 153.527-A | 4.19 | A | WCA3 | 10.16  | 0.62 | 5.24  | 21 | 10.24 | 1.86   |       | 475 | 73    |
| 2007 | GREG | gc60    | gc60-1    | 6.71 | A | WCA3 | 10.16  | 0.62 | 5.24  | 15 | 20.50 | 3.97   |       | 130 | 33    |
| 2007 | GREG | gc48    | gc48-1    |      | A | WCA3 | 14.88  | 0.65 | 4.66  | 15 | 11.40 | 0.99   |       | 265 | 44    |
| 2007 | GREG | gc53    | gc53-1    | 2.16 | A | WCA3 | 14.88  | 0.65 | 4.66  | 15 | 6.46  | 4.14   | 39.83 | 245 | 47    |
| 2007 | GREG | gc53    | gc53-2    | 2.12 | B | WCA3 | 14.88  | 0.65 | 4.66  | 12 | 6.26  | 2.93   | 23.97 | 160 | 36    |
| 2006 | GREG | gc7     | gc7-1     | 3.66 | A | WCA1 | 12.78  | 0.70 | 22.94 | 21 | 67.00 | 3.69   | 14.01 | 405 | 61.8  |
| 2006 | GREG | gc4     | gc4-1     | 2.78 | A | WCA1 | 16.7   | 0.70 | 22.94 | 33 | 58.83 | 4.20   | 4.20  | 840 | 125   |
| 2006 | GREG | gc16    | gc16-1    | 3.67 | A | WCA1 | 3.44   | 0.70 | 15.15 | 21 | 2.81  | 0.32   | 0.32  | 500 | 73.9  |
| 2007 | GREG | gc87    | gc87-1    | 3.28 | A | WCA2 | -9.32  | 0.76 | 13.8  | 15 | 40.62 | 22.56  | 7.53  | 275 | 44    |
| 2007 | GREG | gc87    | gc87-2    | 2.70 | B | WCA2 | -9.32  | 0.76 | 13.8  | 15 | 52.59 | 7.83   |       | 280 | 48    |
| 2007 | GREG | gc88    | gc88-1    | 3.27 | A | WCA2 | -9.32  | 0.76 | 13.8  | 18 | 7.22  | 5.92   |       | 405 | 65    |
| 2007 | GREG | gc88    | gc88-2    | 3.59 | B | WCA2 | -9.32  | 0.76 | 13.8  | 18 | 10.08 | 2.67   | 2.44  | 455 | 69    |

|      |      |         |           |      |   |      |        |      |       |    |       |       |       |     |      |
|------|------|---------|-----------|------|---|------|--------|------|-------|----|-------|-------|-------|-----|------|
| 2007 | GREG | gc91    | gc91-1    | 4.51 | A | WCA2 | -9.32  | 0.76 | 13.8  | 9  | 4.62  | 7.56  | 6.47  | 150 | 38   |
| 2007 | GREG | gc92    | gc92-1    | 4.09 | A | WCA2 | -9.32  | 0.76 | 13.8  | 21 | 18.56 | 3.49  | 1.25  | 675 | 91   |
| 2007 | GREG | gc93    | gc93-1    | 4.20 | A | WCA2 | -9.32  | 0.76 | 13.8  | 9  | 24.30 | 5.15  | 6.51  | 170 | 37   |
| 2007 | GREG | gc94    | gc94-1    | 2.98 | A | WCA2 | -9.32  | 0.76 | 13.8  | 15 | 10.52 | 99.10 | 11.83 | 350 | 62   |
| 2007 | GREG | gc94    | gc94-2    | 2.87 | B | WCA2 | -9.32  | 0.76 | 13.8  | 15 | 44.06 | 23.22 | 21.36 | 260 | 53   |
| 2007 | GREG | gc27new | gc27new-1 | 3.52 | A | WCA1 | -3.6   | 0.77 | 7.27  | 12 | 27.21 | 18.15 | 20.20 | 350 | 49   |
| 2007 | GREG | gc27new | gc27new-2 | 5.28 | B | WCA1 | -3.6   | 0.77 | 7.27  | 12 | 9.48  |       | 8.58  | 280 | 45   |
| 2007 | GREG | gc27    | gc27-1    | 4.42 | A | WCA1 | -3.6   | 0.77 | 7.27  | 15 | 4.91  | 16.65 | 59.03 | 430 | 65   |
| 2007 | GREG | gc28    | gc28-1    | 4.55 | A | WCA1 | -3.6   | 0.77 | 7.27  | 15 | 32.43 | 6.86  | 6.52  | 430 | 69   |
| 2007 | GREG | gc28    | gc28-2    | 4.97 | B | WCA1 | -3.6   | 0.77 | 7.27  | 12 | 8.95  |       | 10.79 | 320 | 52   |
| 2007 | GREG | gc30    | gc30-1    | 2.70 | A | WCA1 | -3.6   | 0.77 | 7.27  | 12 |       | 1.61  | 2.59  | 300 | 50   |
| 2007 | GREG | gc30    | gc30-2    | 2.15 | B | WCA1 | -3.6   | 0.77 | 7.27  | 12 | 8.83  |       | 20.67 | 235 | 42   |
| 2007 | GREG | 152.686 | 152.686-A | 3.27 | A | WCA1 | -3.6   | 0.77 | 7.27  | 18 | 4.03  | 3.67  | 7.21  | 570 | 78   |
| 2007 | GREG | 152.686 | 152.686-B | 2.21 | B | WCA1 | -3.6   | 0.77 | 7.27  | 15 | 22.55 | 12.21 | 15.55 | 250 | 50   |
| 2007 | GREG | GC57    | GC57-1    | 4.63 | A | WCA3 | 17.21  | 0.80 | 3.19  | 3  |       |       | 67.89 | 80  | 25   |
| 2007 | GREG | gc60    | gc60-1    | 4.89 | A | WCA3 | 0.3    | 0.81 | 4.04  | 24 | 25.06 | 48.09 | 4.13  | 385 | 71   |
| 2007 | GREG | gc60    | gc60-2    | 4.41 | B | WCA3 | 0.3    | 0.81 | 4.04  | 24 | 6.71  | 2.65  | 17.78 | 450 | 65   |
| 2007 | GREG | 153.527 | 153.527-A | 4.12 | A | WCA3 | 0.3    | 0.81 | 4.04  | 30 | 8.30  |       | 8.40  | 670 | 103  |
| 2007 | GREG | 153.527 | 153.527-B | 5.66 | B | WCA3 | 0.3    | 0.81 | 4.04  | 30 | 7.44  | 6.29  | 10.56 | 470 | 68   |
| 2007 | GREG | gc6     | gc6-1     | 0.66 | A | WCA1 | -19.08 | 0.83 | 12.42 | 3  |       |       | 12.04 | 50  | 19   |
| 2007 | GREG | gc5     | gc5-1     | 0.58 | A | WCA1 | -19.08 | 0.83 | 12.42 | 3  |       |       | 15.56 | 115 | 27   |
| 2007 | GREG | gc7     | gc7-1     | 2.28 | A | WCA1 | -19.08 | 0.83 | 12.42 | 3  |       |       | 3.25  | 70  | 21   |
| 2006 | GREG | gc17    | gc17-1    | 5.53 | A | WCA1 | 4.77   | 0.83 | 26.74 | 27 | 55.42 |       | 0.84  | 660 | 91.5 |
| 2006 | GREG | gc18    | gc18-1    | 5.37 | A | WCA1 | 4.77   | 0.83 | 26.74 | 27 | 35.84 |       | 1.00  | 730 | 94.2 |
| 2006 | GREG | gc20    | gc20-1    | 6.02 | A | WCA1 | 4.77   | 0.83 | 26.74 | 27 | 43.19 | 0.81  | 0.97  | 625 | 95.9 |
| 2007 | GREG | GC63    | GC63-1    | 4.64 | A | WCA3 | 7.16   | 0.84 | 4.04  | 18 | 14.12 | 2.31  | 9.68  | 520 | 77   |
| 2007 | GREG | gc63    | gc63-2    | 4.25 | B | WCA3 | 7.16   | 0.84 | 4.04  | 18 | 7.21  | 62.62 | 8.13  | 470 | 75   |
| 2007 | GREG | gc65    | gc65-2    | 2.06 | B | WCA3 | 7.16   | 0.84 | 4.04  | 15 | 12.34 | 40.67 | 7.34  | 315 | 60   |
| 2007 | GREG | gc67    | gc67-1    | 5.19 | A | WCA3 | 7.16   | 0.84 | 4.04  | 24 | 7.30  | 2.00  | 15.32 | 500 | 81   |
| 2007 | GREG | gc67    | gc67-2    | 5.03 | B | WCA3 | 7.16   | 0.84 | 4.04  | 24 | 37.89 | 1.67  | 16.22 | 445 | 78   |
| 2007 | GREG | gc68    | gc68-1    | 4.58 | A | WCA3 | 7.16   | 0.84 | 4.04  | 18 | 57.12 | 1.15  | 9.04  | 505 | 71   |
| 2007 | GREG | gc68    | gc68-2    | 4.95 | B | WCA3 | 7.16   | 0.84 | 4.04  | 18 | 17.35 | 1.87  | 15.64 | 340 | 57   |
| 2007 | GREG | gc69    | gc69-2    | 4.71 | B | WCA3 | 7.16   | 0.84 | 4.04  | 24 | 13.76 | 51.15 | 27.05 | 545 | 81   |
| 2007 | GREG | gc48    | gc48-1    | 2.08 | A | WCA3 | 6.37   | 0.85 | 9.78  | 27 | 13.95 | 52.16 | 8.19  | 685 | 88   |

|      |      |         |           |      |   |      |        |      |       |    |       |       |       |     |       |
|------|------|---------|-----------|------|---|------|--------|------|-------|----|-------|-------|-------|-----|-------|
| 2007 | GREG | gc48    | gc48-2    | 2.47 | B | WCA3 | 6.37   | 0.85 | 9.78  | 24 | 15.47 | 1.83  | 15.16 | 635 | 82    |
| 2007 | GREG | gc53    | gc53-1    | 1.92 | A | WCA3 | 6.37   | 0.85 | 9.78  | 27 | 47.06 |       | 17.63 | 650 | 89    |
| 2007 | GREG | gc53    | gc53-2    | 1.82 | B | WCA3 | 6.37   | 0.85 | 9.78  | 24 | 7.46  | 4.25  | 1.95  | 390 | 67    |
| 2007 | GREG | gc43    | gc43-1    | 2.59 | A | WCA1 | 15.35  | 0.85 | 6.78  | 18 | 10.32 | 76.94 | 3.70  | 530 | 78    |
| 2007 | GREG | gc43    | gc43-2    | 2.35 | B | WCA1 | 15.35  | 0.85 | 6.78  | 15 | 10.30 | 5.07  | 5.02  | 470 | 63    |
| 2007 | GREG | gc44    | gc44-1    | 2.27 | A | WCA1 | 15.35  | 0.85 | 6.78  | 21 | 28.09 | 3.44  | 4.61  | 510 | 71    |
| 2007 | GREG | gc45    | gc45-1    | 4.83 | A | WCA1 | 15.35  | 0.85 | 6.78  | 24 | 33.50 | 4.00  | 6.40  | 250 | 48    |
| 2006 | GREG | gc17    | gc17-1    | 5.97 | A | WCA1 | 3.4    | 0.89 | 26.74 | 15 | 12.20 |       | 0.91  | 445 | 66.8  |
| 2006 | GREG | gc18    | gc18-1    | 6.14 | A | WCA1 | 3.4    | 0.89 | 26.74 | 30 | 9.10  |       | 4.18  | 730 | 101.2 |
| 2007 | GREG | gc49    | gc49-1    | 3.79 | A | WCA3 | 4      | 0.95 | 7.72  | 6  |       |       | 22.17 | 60  | 21    |
| 2006 | GREG | gc12    | gc12-1    | 4.11 | A | WCA1 | 12.78  | 1.17 | 22.94 | 21 | 48.00 | 2.93  | 9.63  | 445 | 63    |
| 2006 | GREG | gc11    | gc11-1    | 3.35 | A | WCA1 | 12.78  | 1.17 | 22.94 | 24 | 28.66 |       | 5.77  | 500 | 70.1  |
| 2007 | GREG | gc72    | gc72-1    | 1.79 | A | WCA1 | -35.72 | 1.34 | 3.83  | 24 | 7.95  |       |       | 660 | 100   |
| 2007 | GREG | gc72    | gc72-2    | 2.38 | B | WCA1 | -35.72 | 1.34 | 3.83  | 21 | 7.17  | 18.02 |       | 530 | 84    |
| 2007 | GREG | gc74    | gc74-2    | 3.09 | B | WCA1 | -35.72 | 1.34 | 3.83  | 18 | 48.52 | 6.94  | 3.92  | 425 | 73    |
| 2007 | GREG | gc76    | gc76-1    | 2.21 | A | WCA1 | -35.72 | 1.34 | 3.83  | 18 | 12.31 | 3.06  | 5.91  | 495 | 74    |
| 2007 | GREG | gc76    | gc76-2    | 2.17 | B | WCA1 | -35.72 | 1.34 | 3.83  | 18 | 3.36  | 33.36 | 8.23  | 425 | 68    |
| 2007 | GREG | gc5     | gc5-1     | 3.93 | A | WCA1 | -23.65 | 1.57 | 4.11  | 18 | 43.10 | 2.51  | 5.54  | 405 | 63    |
| 2007 | GREG | gc7     | gc7-1     | 5.85 | A | WCA1 | -23.65 | 1.57 | 4.11  | 15 | 42.72 | 3.51  | 5.92  | 260 | 46    |
| 2007 | GREG | gc8     | gc8-1     | 5.41 | A | WCA1 | -23.65 | 1.57 | 4.11  | 15 | 7.99  | 8.13  | 25.12 | 400 | 62    |
| 2007 | GREG | gc8     | gc8-2     | 4.81 | B | WCA1 | -23.65 | 1.57 | 4.11  | 15 | 8.55  | 3.84  | 8.17  | 290 | 51    |
| 2007 | GREG | gc10new | gc10new-2 | 4.31 | B | WCA1 | -23.65 | 1.57 | 4.11  | 6  | 29.36 | 1.85  | 13.64 | 170 | 41    |
| 2007 | GREG | gc2     | gc2-1     | 4.08 | A | WCA1 | -23.65 | 1.57 | 4.11  | 9  | 7.80  | 0.91  |       | 480 | 83    |
| 2007 | GREG | gc2     | gc2-2     |      | B | WCA1 | -23.65 | 1.57 | 4.11  | 9  | 4.50  | 1.53  | 5.12  | 470 | 80    |
| 2007 | GREG | gc6     | gc6-1     | 6.55 | A | WCA1 | -23.65 | 1.57 | 4.11  | 15 | 34.58 | 1.31  | 27.57 | 300 | 56    |
| 2007 | GREG | gc6     | gc6-2     | 3.82 | B | WCA1 | -23.65 | 1.57 | 4.11  | 15 |       | 20.08 | 7.18  | 300 | 59    |
| 2006 | GREG | gc10    | gc10-1    | 0.88 | A | WCA1 | 3.44   | 1.89 | 15.15 | 12 | 7.86  |       | 1.94  | 365 | 57.2  |
| 2007 | GREG | gc13    | gc13-1    | 6.55 | A | WCA1 | -23.26 | 1.93 | 8.16  | 24 | 18.23 | 1.40  | 3.04  | 620 | 87    |
| 2007 | GREG | gc13    | gc13-2    | 6.85 | B | WCA1 | -23.26 | 1.93 | 8.16  | 24 | 9.06  | 2.28  |       | 510 | 73    |
| 2007 | GREG | gc14    | gc14-1    | 9.06 | A | WCA1 | -23.26 | 1.93 | 8.16  | 18 | 15.73 | 2.20  |       | 590 | 84    |
| 2007 | GREG | gc14    | gc14-2    | 9.46 | B | WCA1 | -23.26 | 1.93 | 8.16  | 18 | 24.75 | 13.62 |       | 455 | 72    |
| 2007 | GREG | gc15    | gc15-1    | 5.42 | A | WCA1 | -23.26 | 1.93 | 8.16  | 18 | 32.74 | 16.86 | 3.22  | 520 | 75    |
| 2007 | GREG | gc15    | gc15-2    | 5.77 | B | WCA1 | -23.26 | 1.93 | 8.16  | 18 | 10.49 | 2.27  | 23.60 | 355 | 63    |
| 2007 | GREG | gc16    | gc16-1    | 9.17 | A | WCA1 | -23.26 | 1.93 | 8.16  | 18 | 3.31  | 1.62  | 8.80  | 420 | 73    |

|      |      |        |          |      |   |      |        |       |       |    |       |      |       |     |      |
|------|------|--------|----------|------|---|------|--------|-------|-------|----|-------|------|-------|-----|------|
| 2007 | GREG | gc16   | gc16-2   | 9.21 | B | WCA1 | -23.26 | 1.93  | 8.16  | 18 | 7.14  | 2.90 | 11.94 | 410 | 68   |
| 2007 | GREG | gc17   | gc17-1   | 3.10 | A | WCA1 | -23.26 | 1.93  | 8.16  | 24 | 7.23  | 3.79 | 11.54 | 350 | 64   |
| 2007 | GREG | gc18   | gc18-1   | 3.29 | A | WCA1 | -23.26 | 1.93  | 8.16  | 18 | 28.37 | 8.25 | 3.06  | 280 | 43   |
| 2007 | GREG | gc20   | gc20-1   | 7.33 | A | WCA1 | -23.26 | 1.93  | 8.16  | 18 | 30.89 | 2.33 | 7.83  | 400 | 60   |
| 2007 | GREG | gc20   | gc20-2   | 5.96 | B | WCA1 | -23.26 | 1.93  | 8.16  | 15 | 6.00  | 8.79 | 16.48 | 330 | 55   |
| 2007 | GREG | gc12   | gc12-2   | 5.11 | B | WCA1 | -23.26 | 1.93  | 8.16  | 18 | 33.67 | 3.20 | 11.73 | 380 | 70   |
| 2006 | WHIB | wc364  | wc364-1  | 0.12 | A | WCA1 | 13.74  | -2.30 | 15.26 | 18 | 68.28 |      | 0.18  | 545 | 71.7 |
| 2006 | WHIB | wc363  | wc363-1  | 0.10 | A | WCA1 | 13.74  | -2.30 | 15.26 | 18 | 45.08 | 1.91 | 16.33 | 505 | 69.8 |
| 2006 | WHIB | wc362  | wc362-1  | 0.56 | A | WCA1 | 13.74  | -2.30 | 15.26 | 18 | 0.98  |      | 12.82 | 690 | 84.2 |
| 2006 | WHIB | wcr100 | wcr100-1 | 0.26 | A | WCA1 | 13.74  | -2.30 | 15.26 | 18 | 24.31 | 3.10 | 0.93  | 435 | 63.5 |
| 2007 | WHIB | wc72   | wc72-1   | 2.49 | A | WCA1 | -33.77 | -0.76 | 6.78  | 3  |       |      | 12.69 | 75  | 20   |
| 2007 | WHIB | wc62   | wc62-1   | 0.24 | A | WCA1 | -33.77 | -0.76 | 6.78  | 6  |       |      | 12.61 | 190 | 37   |
| 2007 | WHIB | wc22   | wc22-2   | 0.30 | B | WCA1 | 9.73   | -0.76 | 6.78  | 6  |       |      | 10.26 | 140 | 31   |
| 2007 | WHIB | wc22   | wc22-1   | 0.04 | A | WCA1 | 9.73   | -0.76 | 6.78  | 9  |       |      | 17.98 | 290 | 45   |
| 2006 | WHIB | wcr163 | wcr163-1 | 0.17 | A | WCA3 | -26.37 | -0.65 | 8.81  | 27 | 13.15 |      | 0.04  | 520 | 79.6 |
| 2006 | WHIB | wc3    | wc3-1    | 0.18 | A | WCA1 | 1.59   | -0.23 | 1.83  | 24 | 18.07 |      | 14.61 | 605 | 80.2 |
| 2006 | WHIB | wc76   | wc76-2   | 0.56 | B | WCA1 | 9.35   | -0.14 | 26.74 | 12 | 29.46 |      | 0.01  | 292 | 42.1 |
| 2006 | WHIB | wv72   | wv72-1   | 0.23 | A | WCA1 | 9.35   | -0.14 | 26.74 | 15 | 37.82 |      | 24.61 | 304 | 46.2 |
| 2006 | WHIB | wc79   | wc79-2   | 0.23 | B | WCA1 | 9.35   | -0.14 | 26.74 | 12 | 20.33 |      | 2.00  | 298 | 43.8 |
| 2006 | WHIB | 91316  | 91316-1  | 0.18 | A | WCA1 | 9.35   | -0.14 | 26.74 | 6  | 29.18 | 2.72 | 3.49  | 153 | 30.6 |
| 2006 | WHIB | wc72   | wc72-2   | 0.28 | B | WCA1 | 9.35   | -0.14 | 26.74 | 12 | 2.85  | 3.80 | 8.33  | 300 | 44.7 |
| 2006 | WHIB | wc76   | wc76-1   | 0.73 | A | WCA1 | 9.35   | -0.14 | 26.74 | 15 | 7.79  |      | 2.49  | 295 | 45.9 |
| 2006 | WHIB | 91320  | 91320-1  | 0.37 | A | WCA1 | 9.35   | -0.14 | 26.74 | 6  | 8.49  | 1.99 | 3.20  | 154 | 30.1 |
| 2006 | WHIB | 91304  | 91304-1  | 0.55 | A | WCA1 | 9.35   | -0.14 | 26.74 | 6  | 9.99  |      | 1.36  | 134 | 28.7 |
| 2006 | WHIB | 91321  | 91321-1  | 0.35 | A | WCA1 | 9.35   | -0.14 | 26.74 | 6  | 50.49 | 2.76 | 0.04  | 127 | 26.2 |
| 2007 | WHIB | wc77   | wc77-1   | 0.72 | A | WCA1 | -13.16 | 0.41  | 4.06  | 24 | 18.62 | 3.19 | 20.91 | 385 | 62   |
| 2007 | WHIB | hid13  | hid13-1  | 0.34 | A | WCA3 | -2.5   | 0.57  | 4.65  | 9  | 6.77  | 1.66 | 20.94 | 215 | 43   |
| 2007 | WHIB | wc1    | wc1-1    | 6.58 | A | WCA1 | -2.3   | 0.62  | 6.78  | 6  | 35.03 | 2.62 |       | 370 | 48   |
| 2007 | WHIB | wc2    | wc2-2    | 2.21 | B | WCA1 | -2.3   | 0.62  | 6.78  | 3  |       |      |       | 110 | 26   |
| 2007 | WHIB | wc10   | wc10-1   | 1.23 | A | WCA1 | -2.3   | 0.62  | 6.78  | 6  |       |      |       | 150 | 29   |
| 2007 | WHIB | wc10   | wc10-2   | 1.53 | B | WCA1 | -2.3   | 0.62  | 6.78  | 3  |       |      |       | 70  | 21   |
| 2007 | WHIB | wc11   | wc11-1   | 0.92 | A | WCA1 | -2.3   | 0.62  | 6.78  | 3  |       |      |       | 70  | 21   |
| 2007 | WHIB | wc12   | wc12-2   | 0.40 | B | WCA1 | -2.3   | 0.62  | 6.78  | 6  |       |      |       | 160 | 29   |
| 2007 | WHIB | wc17   | wc17-2   | 8.19 | B | WCA1 | -2.3   | 0.62  | 6.78  | 3  |       |      |       | 110 | 25   |

|      |      |       |         |      |   |      |        |      |       |    |       |       |       |     |      |
|------|------|-------|---------|------|---|------|--------|------|-------|----|-------|-------|-------|-----|------|
| 2007 | WHIB | wc2   | wc2-1   | 0.30 | A | WCA1 | -2.3   | 0.62 | 6.78  | 6  | 19.96 | 1.63  |       | 175 | 33   |
| 2007 | WHIB | wc14  | wc14-1  | 0.28 | A | WCA1 | 3.38   | 0.62 | 6.78  | 3  |       | 1.88  |       | 110 | 22   |
| 2007 | WHIB | wc42  | wc42-1  | 0.13 | A | WCA1 | -3.59  | 0.63 | 7.52  | 15 | 4.13  | 16.58 | 18.42 | 495 | 70   |
| 2007 | WHIB | wc44  | wc44-1  | 0.17 | A | WCA1 | -3.59  | 0.63 | 7.52  | 12 | 10.82 | 47.84 | 7.59  | 420 | 61   |
| 2007 | WHIB | wc49  | wc49-1  | 0.38 | A | WCA1 | -3.59  | 0.63 | 7.52  | 9  | 66.28 | 1.57  | 26.74 | 260 | 45   |
| 2007 | WHIB | wc50  | wc50-1  | 0.16 | A | WCA1 | -3.59  | 0.63 | 7.52  | 12 | 66.64 | 1.10  | 15.19 | 495 | 63   |
| 2007 | WHIB | wc51  | wc51-1  | 0.39 | A | WCA1 | -3.59  | 0.63 | 7.52  | 12 | 35.01 | 0.83  | 20.63 | 310 | 50   |
| 2007 | WHIB | wc76  | wc76-1  | 0.13 | A | WCA1 | 0.16   | 0.63 | 7.52  | 6  | 29.16 | 2.97  | 5.80  | 205 | 34   |
| 2006 | WHIB | wc10  | wc10-1  | 3.67 | A | WCA3 | -26.37 | 0.70 | 14.38 | 18 | 1.60  | 1.29  | 0.37  | 275 | 57.2 |
| 2006 | WHIB | WC6   | WC6-1   | 0.85 | A | WCA3 | -26.37 | 0.70 | 14.38 | 15 | 2.14  | 6.46  | 0.92  | 290 | 44.3 |
| 2006 | WHIB | 44190 | 44190-1 | 6.62 | A | WCA1 | 9.73   | 0.75 | 26.74 | 3  | 10.85 |       | 4.02  | 80  | 24   |
| 2007 | WHIB | wrc   | wrc-1   | 1.97 | A | WCA3 | -4.37  | 0.76 | 11.55 | 15 | 5.45  | 1.31  | 7.20  | 320 | 53   |
| 2007 | WHIB | wrc   | wrc-2   | 1.45 | A | WCA3 | -4.37  | 0.76 | 11.55 | 15 | 49.39 | 1.01  | 5.49  | 340 | 55   |
| 2007 | WHIB | wrc   | wrc-3   | 0.39 | A | WCA3 | -4.37  | 0.76 | 11.55 | 15 | 12.91 | 0.94  | 7.04  | 200 | 45   |
| 2007 | WHIB | wrc   | wrc-5   | 1.47 | A | WCA3 | -4.37  | 0.76 | 11.55 | 15 | 16.19 | 1.26  | 14.70 | 315 | 60   |
| 2007 | WHIB | wrc   | wrc-6   | 0.61 | A | WCA3 | -4.37  | 0.76 | 11.55 | 21 | 8.09  | 2.26  | 34.40 | 570 | 79   |
| 2007 | WHIB | wc64  | wc64-1  | 0.32 | A | WCA1 | -42.51 | 0.83 | 6.78  | 18 | 9.98  | 1.13  | 6.63  | 350 | 53   |
| 2007 | WHIB | wc68  | wc68-1  | 0.88 | A | WCA1 | -42.51 | 0.83 | 6.78  | 18 | 16.48 | 1.41  | 7.43  | 465 | 69   |
| 2007 | WHIB | wr11  | wr11    | 0.18 | A | WCA1 | 9.73   | 0.85 | 6.78  | 24 | 2.49  | 0.89  | 6.25  | 540 | 66   |
| 2007 | WHIB | wr1   | wr1     | 0.31 | A | WCA1 | 9.73   | 0.85 | 6.78  | 24 | 35.13 | 71.29 |       | 420 | 66   |
| 2007 | WHIB | wr2   | wr2     | 0.27 | A | WCA1 | 9.73   | 0.85 | 6.78  | 21 | 28.22 | 1.60  | 8.05  | 345 | 58   |
| 2007 | WHIB | wr3   | wr3     | 0.22 | A | WCA1 | 9.73   | 0.85 | 6.78  | 26 | 18.22 | 1.73  |       | 390 | 66   |
| 2007 | WHIB | wr4   | wr4     | 0.05 | A | WCA1 | 9.73   | 0.85 | 6.78  | 30 | 5.34  | 2.55  | 8.80  | 680 | 82   |
| 2007 | WHIB | wr5   | wr5     | 0.37 | A | WCA1 | 9.73   | 0.85 | 6.78  | 24 | 20.63 | 1.61  |       | 360 | 59   |
| 2007 | WHIB | wr6   | wr6     | 0.49 | A | WCA1 | 9.73   | 0.85 | 6.78  | 24 | 10.04 |       | 42.82 | 500 | 72   |
| 2007 | WHIB | wr8   | wr8     | 0.11 | A | WCA1 | 9.73   | 0.85 | 6.78  | 24 | 17.10 | 3.80  | 8.16  | 480 | 75   |
| 2007 | WHIB | wr9   | wr9     | 0.09 | A | WCA1 | 9.73   | 0.85 | 6.78  | 24 | 7.43  | 1.31  | 12.99 | 510 | 70   |
| 2007 | WHIB | wcsg  | wcsg-1  | 0.42 | A | WCA1 | 9.73   | 0.85 | 6.78  | 12 | 10.24 | 3.18  | 7.11  | 360 | 56   |
| 2006 | WHIB | 91316 | 91316-1 | 0.20 | A | WCA1 | 9.73   | 0.97 | 15.26 | 12 | 42.95 | 2.47  | 4.89  | 317 | 44.2 |
| 2006 | WHIB | 91330 | 91330-1 | 0.62 | A | WCA1 | 9.73   | 0.97 | 15.26 | 12 | 8.55  | 4.72  | 6.22  | 308 | 43.1 |
| 2006 | WHIB | 91346 | 91346-1 | 0.81 | A | WCA1 | 9.73   | 0.97 | 15.26 | 12 | 27.33 |       | 4.14  | 321 | 44.2 |
| 2006 | WHIB | 91311 | 91311-1 | 0.54 | A | WCA1 | 9.73   | 0.97 | 15.26 | 12 | 27.41 |       | 1.36  | 310 | 44.7 |
| 2006 | WHIB | 91319 | 91319-1 | 0.57 | A | WCA1 | 9.73   | 0.97 | 15.26 | 12 |       | 5.58  | 1.15  | 340 | 51   |
| 2006 | WHIB | 91309 | 91309-1 | 0.39 | A | WCA1 | 9.73   | 0.97 | 15.26 | 12 |       | 4.43  | 4.43  | 340 | 50   |

|      |      |        |          |      |   |      |       |      |       |    |       |      |       |       |      |
|------|------|--------|----------|------|---|------|-------|------|-------|----|-------|------|-------|-------|------|
| 2007 | WHIB | wc34   | wc34-1   | 1.68 | A | WCA3 | 7.68  | 1.15 | 3.57  | 3  |       |      | 12.77 | 120   | 31   |
| 2007 | WHIB | wc34   | wc34-2   | 4.36 | B | WCA3 | 7.68  | 1.15 | 3.57  | 3  |       |      | 2.98  | 85    | 26   |
| 2007 | WHIB | wc35   | wc35-1   | 3.12 | A | WCA3 | 7.68  | 1.15 | 3.57  | 6  |       |      | 11.43 | 170   | 35   |
| 2007 | WHIB | wc35   | wc35-2   | 1.73 | B | WCA3 | 7.68  | 1.15 | 3.57  | 3  |       |      |       | 100   | 29   |
| 2007 | WHIB | wc36   | wc36-1   | 2.07 | A | WCA3 | 7.68  | 1.15 | 3.57  | 3  |       |      | 10.64 | 100   | 29   |
| 2007 | WHIB | wc36   | wc36-2   | 1.23 | B | WCA3 | 7.68  | 1.15 | 3.57  | 3  |       |      | 6.77  | 95    | 30   |
| 2007 | WHIB | wc37   | wc37-2   | 3.16 | B | WCA3 | 7.68  | 1.15 | 3.57  | 3  |       |      | 3.62  | 80    | 25   |
| 2007 | WHIB | wc38   | wc38-2   | 1.50 | B | WCA3 | 7.68  | 1.15 | 3.57  | 3  |       |      | 15.58 | 60    | 20   |
| 2007 | WHIB | wc40   | wc40-1   | 2.53 | A | WCA3 | 7.68  | 1.15 | 3.57  | 6  |       |      | 7.09  | 190   | 40   |
| 2007 | WHIB | wc27   | wc27-1   | 0.36 | A | WCA3 | 7.68  | 1.15 | 3.57  | 6  |       |      | 3.53  | 135   | 30   |
| 2007 | WHIB | wc27   | wc27-2   | 1.62 | B | WCA3 | 7.68  | 1.15 | 3.57  | 3  |       |      | 11.01 | 80    | 24   |
| 2007 | WHIB | wc28   | wc28-2   | 0.57 | B | WCA3 | 7.68  | 1.15 | 3.57  | 3  |       |      | 4.01  | 115   | 25   |
| 2007 | WHIB | wc29   | wc29-1   | 0.67 | A | WCA3 | 7.68  | 1.15 | 3.57  | 9  | 16.85 |      | 3.79  | 260   | 40   |
| 2007 | WHIB | wc31   | wc31-1   | 2.31 | A | WCA3 | 7.68  | 1.15 | 3.57  | 6  |       |      | 3.44  | 230   | 36   |
| 2007 | WHIB | wc30   | wc30-1   | 2.12 | A | WCA3 | 7.68  | 1.15 | 3.57  | 6  |       |      |       | 195   | 32   |
| 2007 | WHIB | wc30   | wc30-2   | 3.13 | B | WCA3 | 7.68  | 1.15 | 3.57  | 3  |       |      | 22.09 | 120   | 29   |
| 2006 | WHIB | 91319  | 91319-1  | 0.99 | A | WCA1 | 9.73  | 1.39 | 15.26 | 21 | 24.74 |      | 0.65  | 570.4 | 66.7 |
| 2006 | WHIB | 91306  | 91306-1  | 0.17 | A | WCA1 | 9.73  | 1.39 | 15.26 | 21 | 40.82 | 1.08 | 3.61  | 570   | 67   |
| 2006 | WHIB | 91304  | 91304-1  | 0.26 | A | WCA1 | 9.73  | 1.39 | 15.26 | 21 | 8.20  |      | 8.30  | 550   | 66   |
| 2006 | WHIB | 91333  | 91333-1  | 0.41 | A | WCA1 | 9.35  | 1.59 | 15.15 | 6  | 35.76 |      | 0.25  | 120   | 26.8 |
| 2006 | WHIB | wcr151 | wcr151-4 | 2.11 | A | WCA1 | 10.45 | 1.59 | 15.15 | 18 | 1.16  | 2.81 | 4.12  | 350   | 54.4 |
